# Supplementary material
Source: MDPI journal article supplement (https://www.mdpi.com/2073-4441/12/10/2739)
Supplement: s1 [file s1]

# **Understanding the Hydropower and Climate Change Potential Impact on the Himalayan River Regimes-A Study of Local Perceptions and Responses from Himachal Pradesh, India**

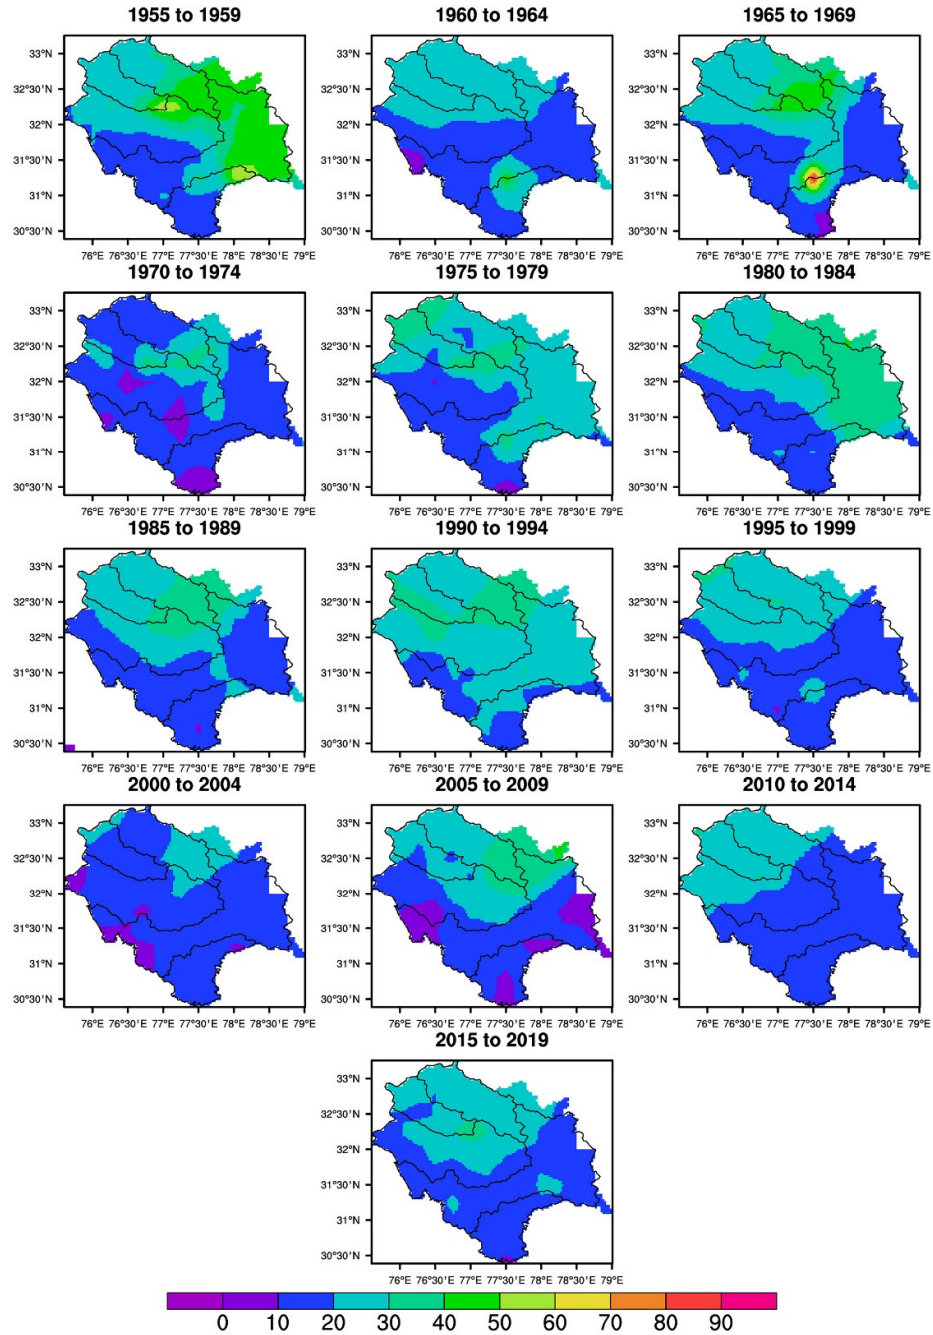

**Figure S1.** Pentads showing total rainfall in winter season (DJF) in Himachal Pradesh. Each pentad shows the mean of the five years from 1955-2019.

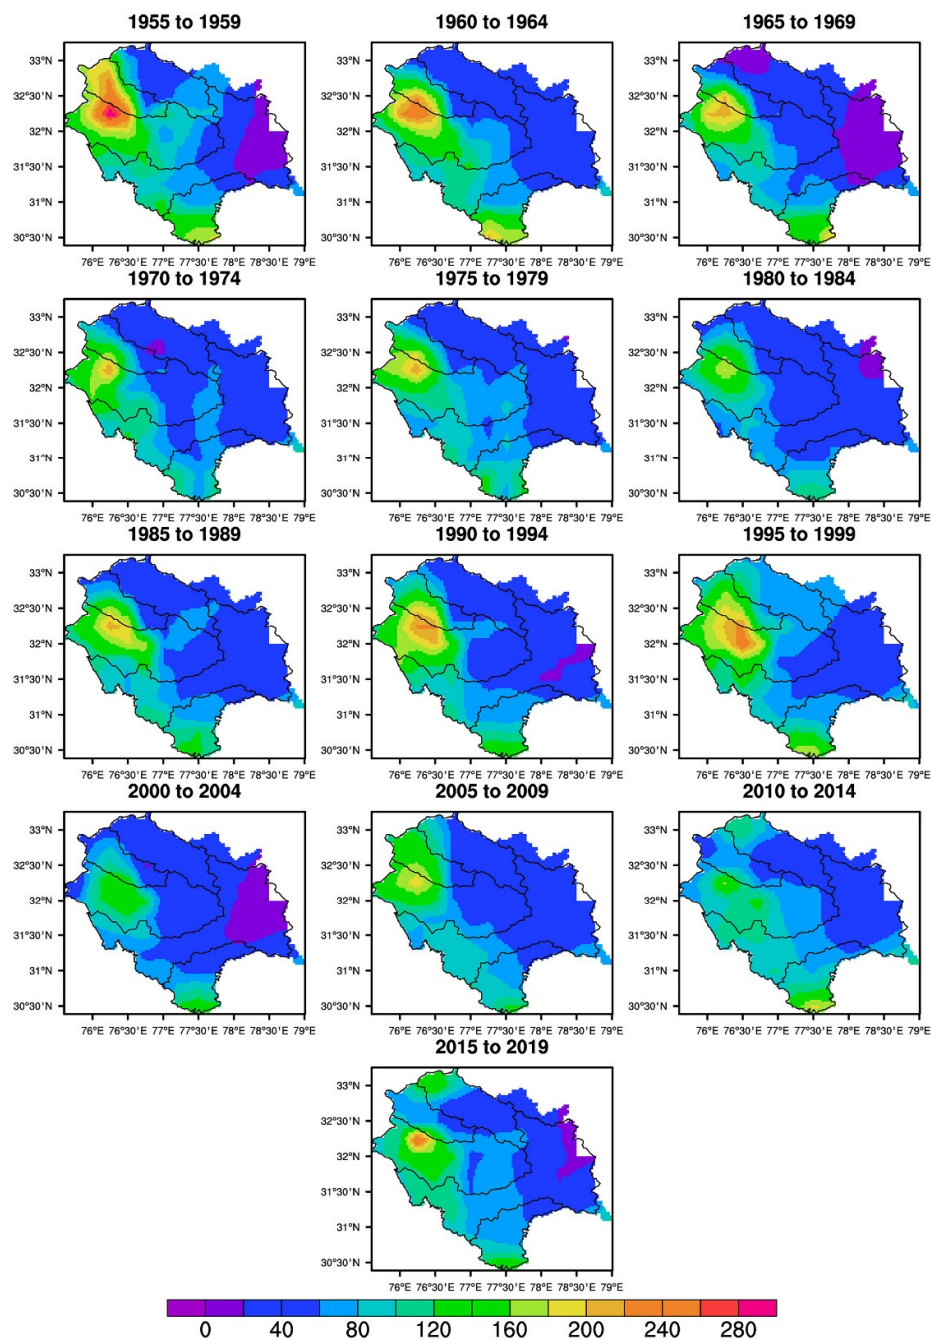

**Figure S2.** Pentads showing total rainfall in monsoon season (JJAS) in Himachal Pradesh. Each pentad shows the mean of the five years from 1955-2019.

## Mean Temperature (in °C) in Winter Season (DJF)

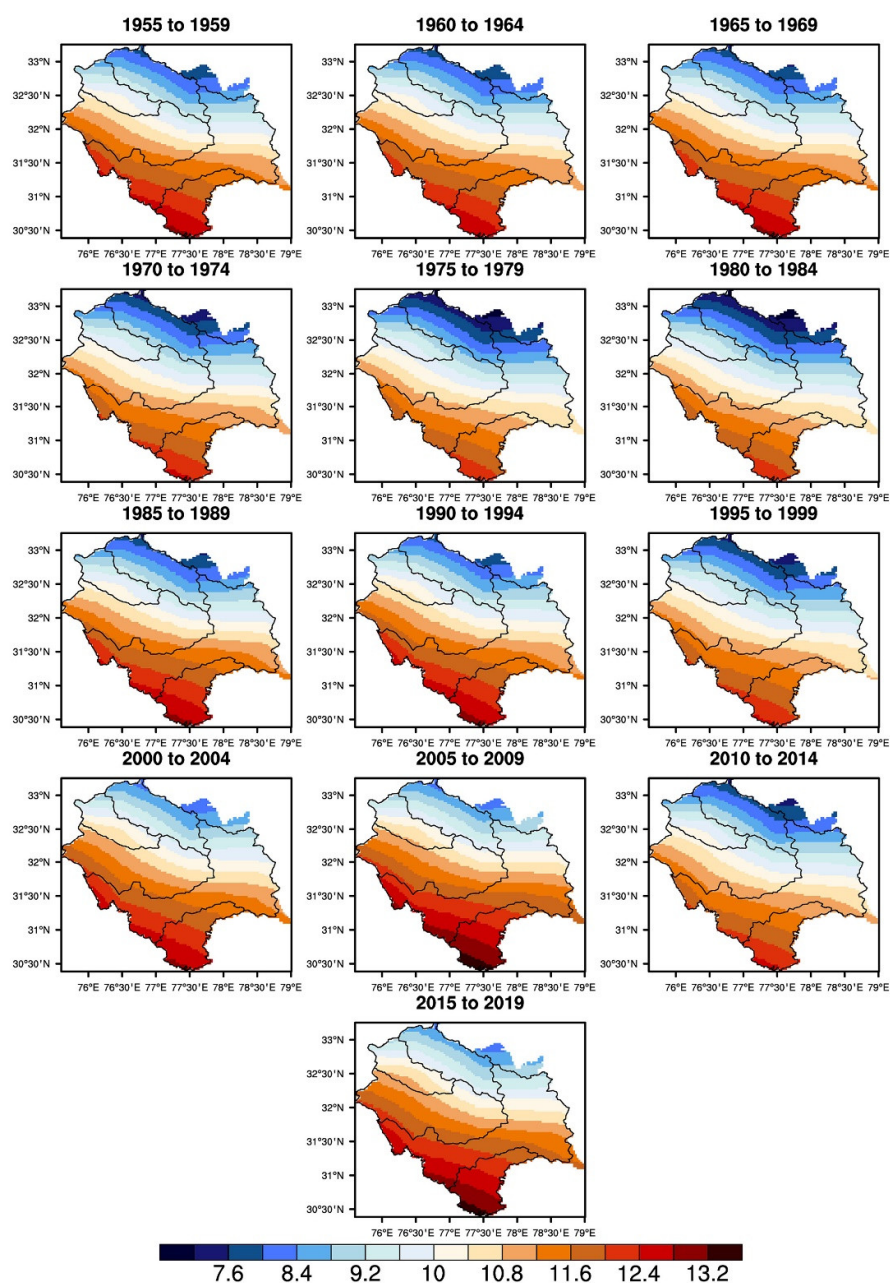

**Figure S3.** Pentads showing mean temperature in winter season (DJF) in Himachal Pradesh. Each pentad shows the mean of the five years from 1955-2019.

## Mean Temperature (in °C) in Monsoon Season (JJAS)

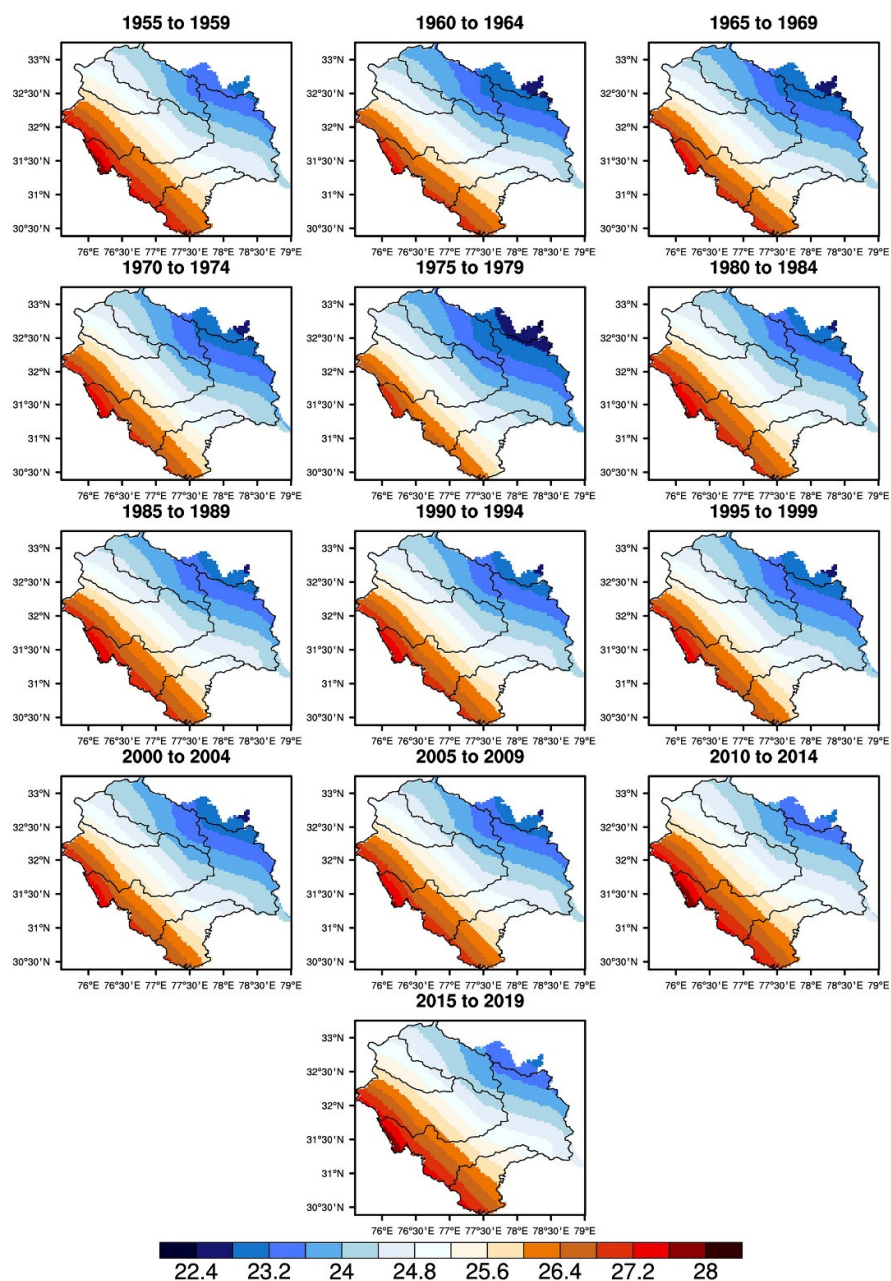

**Figure S4.** Pentads showing mean temperature in monsoon season (JJAS) in Himachal Pradesh. Each pentad shows the mean of the five years from 1955-2019.

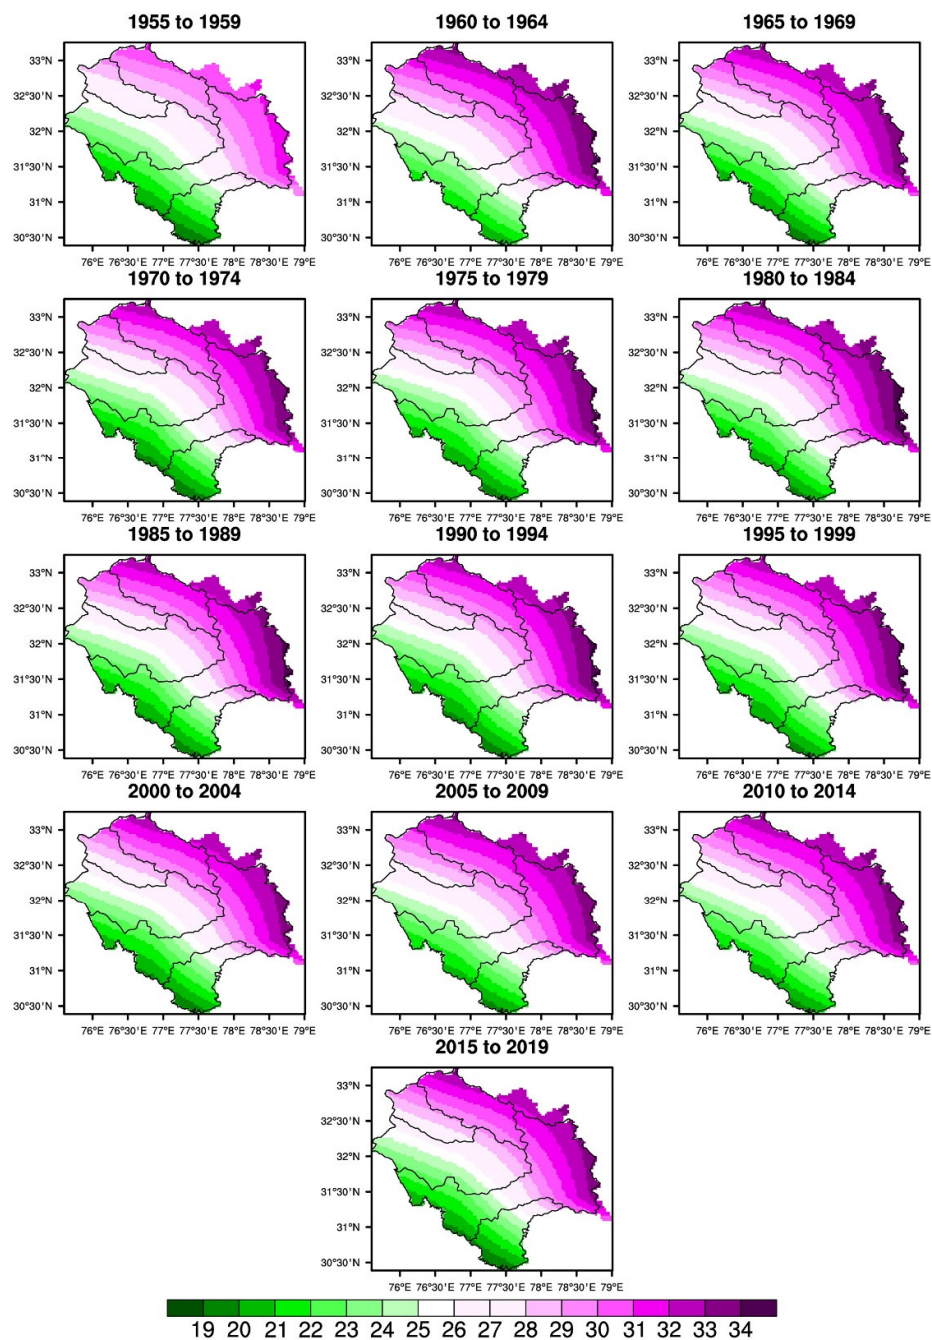

**Figure S5.** Pentads showing total soil moisture in winter season (DJF) in Himachal Pradesh. Each pentad shows the mean of the five years from 1955-2019.

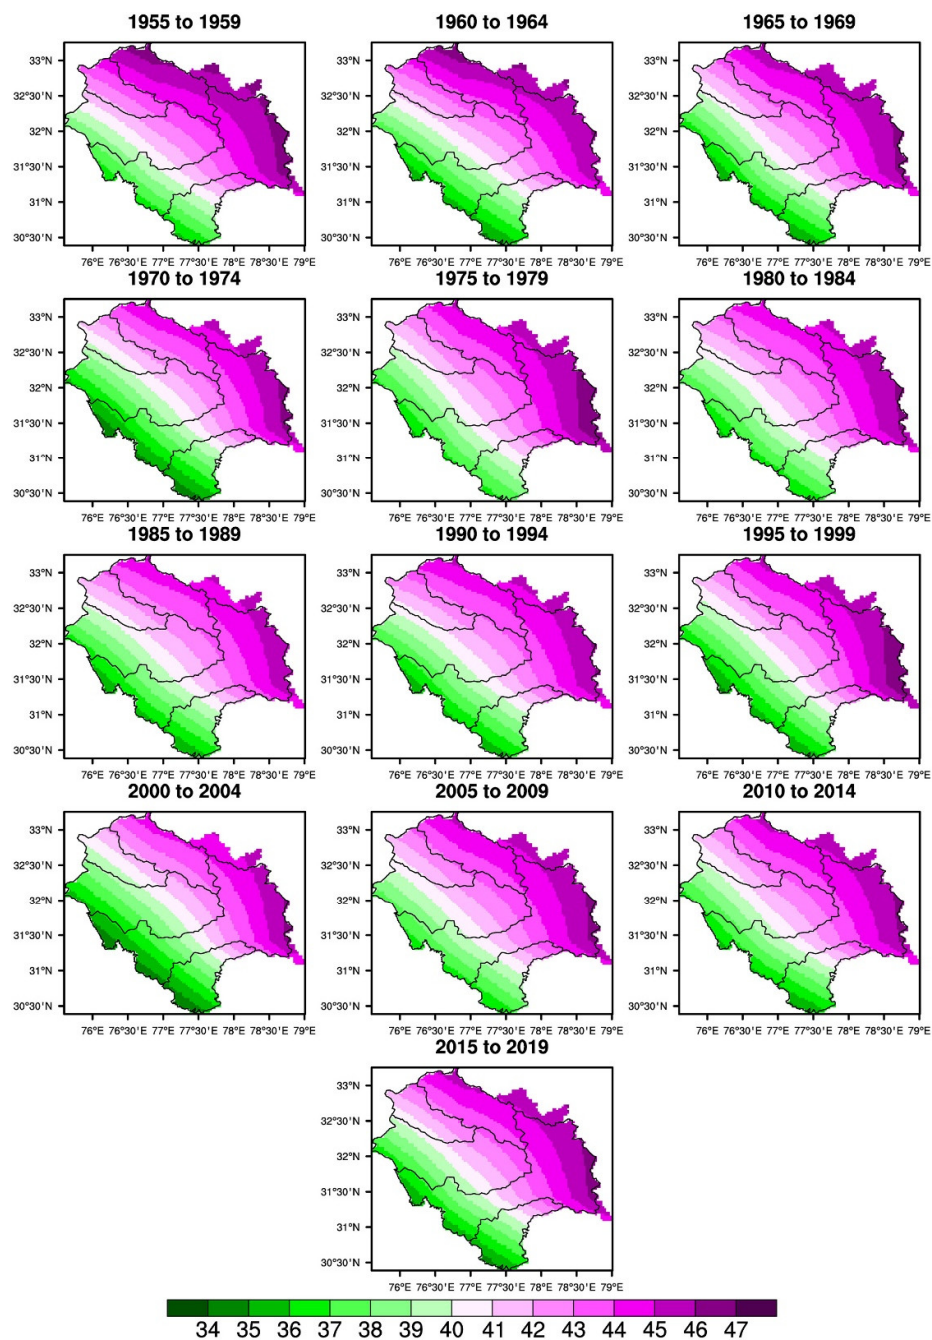

**Figure S6.** Pentads showing total soil moisture in monsoon season (JJAS) in Himachal Pradesh. Each pentad shows the mean of the five years from 1955-2019.
